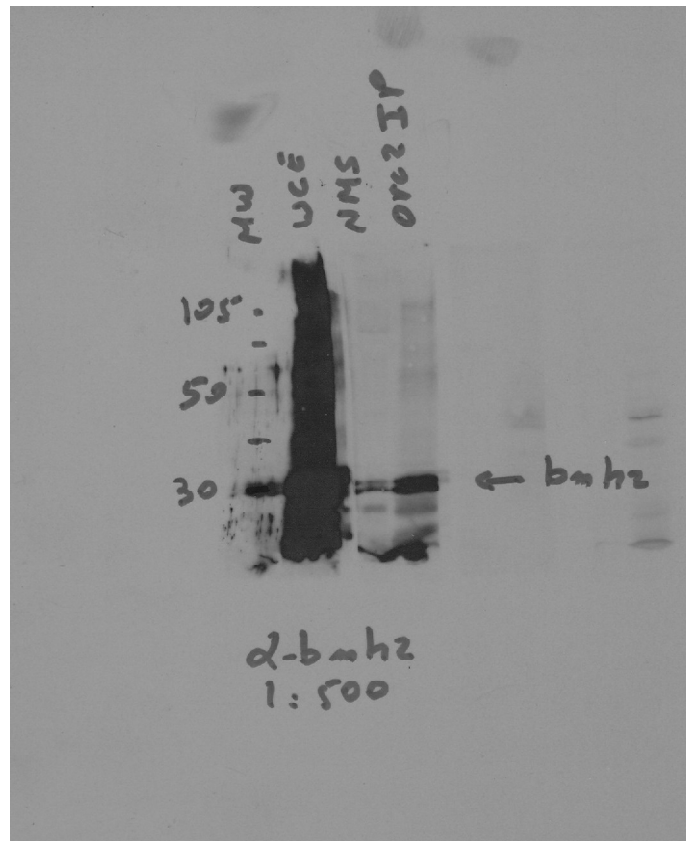

**Fig. S1:** Interaction of Bmh2 with ORC2 protein. Extracts from wild-type cells were immunoprecipitated with anti-Orc2 antibody and immunoblotted with anti-Bmh2 antibody. Normal mouse serum (NMS) was used as a negative control for the IP. The over exposition of the scan show a significant amount of Bmh2 bound to the beads compared to the non specific binding shown in the NMS lane. Molecular weight (MW) (Lane 1), whole cell extract (WCE) (lane2), normal mouse serum (NMS) (lane 3), and Orc2 IP (lane 4).
